# Supplementary material for: Carbon nanotube-assisted synthesis of ferromagnetic Heusler nanoparticles of Fe3Ga (Nano-Galfenol)
Source: Royal Society of Chemistry journal article supplement (doi:10.1039/c7tc04618a), 2018-01-01
Supplement: c7tc04618a1.pdf [file c7tc04618a1.pdf]

Carbon nanotube-assisted synthesis of ferromagnetic Heusler nanoparticles of Fe<sub>3</sub>Ga  
"Nano-Galfenol"

*Rasha Ghunaim*<sup>a, b, \*</sup>, *Victoria Eckert*<sup>a</sup>, *Maik Scholz*<sup>a</sup>, *Markus Gellesch*<sup>a</sup>, *Sabine Wurmehl*<sup>a, c</sup>,  
*Christine Damm*<sup>a</sup>, *Bernd Büchner*<sup>a, c</sup>, *Michael Mertig*<sup>b, d</sup>, *Silke Hampel*<sup>a</sup>

<sup>a</sup> Leibniz Institute for Solid State and Material Research Dresden, Helmholtzstrasse. 20, 01069 Dresden, Germany

<sup>b</sup> Institute for Physical Chemistry, Technische Universität Dresden, 01062 Dresden, Germany

<sup>c</sup> Institute for Solid State Physics, Technische Universität Dresden, 01062 Dresden, Germany

<sup>d</sup> Kurt-Schwabe-Institut für Mess- und Sensortechnik e.V. Meinsberg, 04736 Waldheim, Germany

\*Contact E-mail: [r.ghunaim@ifw-dresden.de](mailto:r.ghunaim@ifw-dresden.de) (Rasha Ghunaim)

Supplementary data

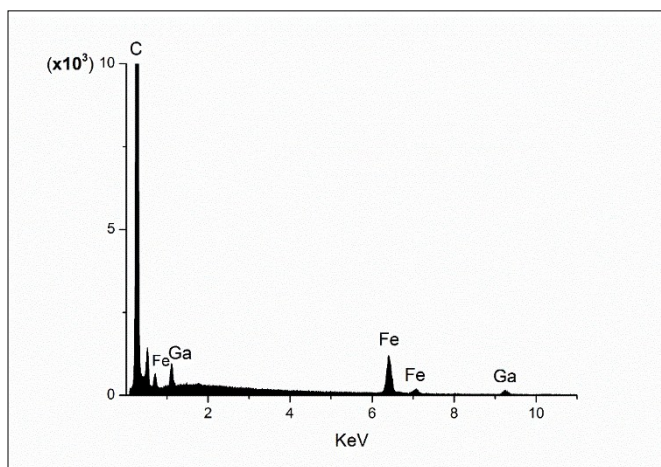

Figure 1: SEM-EDX quantitative measurement for the Fe:Ga ratio over a selected area for the annealed sample of Fe<sub>3</sub>Ga@CNT prepared by the second filling approach, in which the ratio roughly corresponds to 3:1.

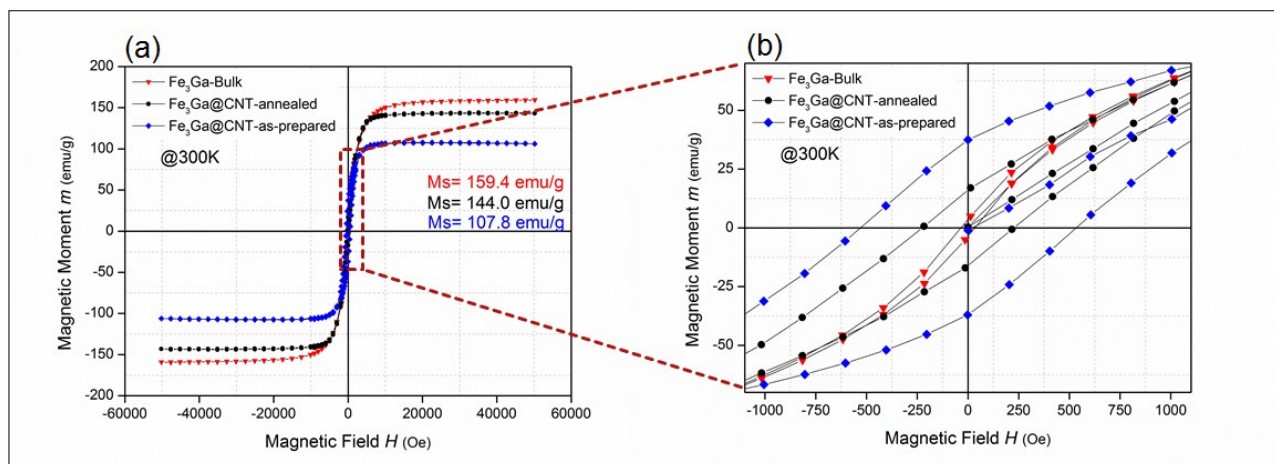

Figure 2: Hysteresis curves, measured at 300K, for the Fe<sub>3</sub>Ga bulk material in comparison with the Fe<sub>3</sub>Ga@CNT nanoparticles. b) Enlarged view on the hysteresis curves show the enhancement of the coercive field for the Heusler nanoparticles compared to the bulk material.
